# Supplementary material
Source: PubMed Central journal article supplement (PMC10732414)
Supplement: NIHMS1539909-supplement-2.pdf [file NIHMS1539909-supplement-2.pdf]

526 **Supplemental Table: University of Virginia Enhanced Recovery after Surgery Thoracic**

527 **Protocol**

**Preoperative:**

One-on-one teaching with nurse prior to surgery  
Clear fluids up to 2 hours before operation  
Carbohydrate energy drink 2 hours before induction  
Multimodal Analgesia:

Celecoxib 200 mg PO  
Gabapentin 600 mg PO  
Acetaminophen 975 mg PO

No intravenous fluids given in preoperative suite

**Intraoperative:**

Subarachnoid morphine (250 mcg) spinal block  
Ketamine 0.5 mg/kg on induction, followed by infusion at 0.15-0.30 mg/kg/min  
Intercostal block with liposomal bupivacaine (266mg, administered by surgeon)  
Goal directed fluid therapy

Protective Lung Ventilation:

Tidal volumes 6-8 mL/kg IBW for two lung ventilation  
Tidal volumes 3-5 mL/kg IBW for one lung ventilation

PEEP at minimum of 5cm H<sub>2</sub>O unless contraindication or severe COPD

**Postoperative:**

Multimodal Analgesia:

Ketamine infusion at 0.15 mg/kg/min  
Tylenol 975 PO every 6 hours scheduled  
Celecoxib 100 mg PO twice daily scheduled  
Gabapentin 300 mg PO three times daily scheduled  
Oxycodone 5mg PO every 4 hours if needed

Clear liquid diet beginning immediately post-surgery

Up to chair on postoperative day zero

Out of bed and ambulating at least 3 times daily on subsequent days

Chest tubes water sealed as soon as possible removed when no air leak or bloody discharge

528 PO, per oral; PEEP, positive end-expiratory pressure
